# Supplementary material for: Impact of Leishmania donovani infection on the HLA I self peptide repertoire of human macrophages
Source: PubMed Central journal article supplement (PMC6042751; doi:10.1371/journal.pone.0200297), 2018-07-12
Supplement: pone.0200297.s001.pdf [file pone.0200297.s001.pdf]

# Impact of *Leishmania donovani* infection on the HLA I self-peptide repertoire of antigen-presenting cell line THP1-derived macrophages

Lydon W. Nyambura, Saulius Jarmalavicius and Peter Walden

**S1 Table:** HLA I ligands and source proteins identified from THP1MΦi.

## THP1MΦi

| No. | Peptide sequence | Protein name                                                                                       | Measured Mass[M+H] <sup>+</sup> | Mascot Score | HLA     | Subcellular localisation | Biological function                      |
|-----|------------------|----------------------------------------------------------------------------------------------------|---------------------------------|--------------|---------|--------------------------|------------------------------------------|
| 1   | SLIMQDDP         | Parathyroid hormone 2 receptor OS=Homo sapiens GN=PTH2R PE=1 SV=1 PTH2R_HUMAN                      | 917,4                           | 30           | A*02:01 | Plasma Membrane          | Cell communication ; Signal transduction |
| 2   | TLSVPRLP         | Plexin-B3 OS=Homo sapiens GN=PLXNB3 PE=1 SV=2 PLXB3_HUMAN                                          | 881,58                          | 33           | A*02:01 | Plasma Membrane          | Cell communication ; Signal transduction |
| 3   | AVVLGTLHP        | EXOSOME COMPLEX COMPONENT RRP46 OS=HOMO SAPIENS GN=EXOSC5 PE=1 SV=1 EXOS5_HUMAN                    | 905,45                          | 22           | A*02:01 | Nucleolus                | Ribonuclease activity                    |
| 4   | KLGNLAKPT        | Myelin P2 protein OS=Homo sapiens GN=PMP2 PE=1 SV=3 MYP2_HUMAN                                     | 940,55                          | 26           | A*02:01 | Cytoplasm                | Transport                                |
| 5   | TAMDVVYAL        | Histone H4 OS=Homo sapiens GN=HIST1H4A PE=1 SV=2 H4_HUMAN                                          | 981,49                          | 21           | A*02:01 | Nucleus                  | DNA binding                              |
| 6   | SMLDDLNRV*       | Integrin beta-2 OS=Homo sapiens GN=ITGB2 PE=1 SV=2 ITB2_HUMAN                                      | 1077,47                         | 38           | A*02:01 | Plasma Membrane          | Cell communication ; Signal transduction |
| 7   | ALSNLEVKL        | Fermitin family homolog 3 OS=Homo sapiens GN=FERMT3 PE=1 SV=1 URP2_HUMAN                           | 985,53                          | 39           | A*02:01 | Plasma Membrane          | unknown                                  |
| 8   | LLGPRLVLA        | TransMembrane emp24 domain-containing protein 10 OS=Homo sapiens GN=TMED10 PE=1 SV=2 TMEDA_HUMAN   | 950,59                          | 35           | A*02:01 | Membrane                 | Transport                                |
| 9   | TLSDLRVYL        | Sulfiredoxin-1 OS=Homo sapiens GN=SRXN1 PE=1 SV=2 SRXN1_HUMAN                                      | 1078,57                         | 55           | A*02:01 | Cytoplasm                | Stress response                          |
| 10  | VLMTEDIKL*       | Eukaryotic translation initiation factor 4 gamma 1 OS=Homo sapiens GN=EIF4G1 PE=1 SV=4 IF4G1_HUMAN | 1076,55                         | 44           | A*02:01 | Cytoplasm                | Protein metabolism                       |
| 11  | YIMGYISKV*       | Unconventional myosin-Ib OS=Homo sapiens GN=MYO1F PE=1 SV=3 MYO1F_HUMAN                            | 1088,51                         | 38           | A*02:01 | Cytoplasm                | Cell growth and/or maintenance           |

|    |             |                                                                                                              |         |    |         |                 |                                                    |
|----|-------------|--------------------------------------------------------------------------------------------------------------|---------|----|---------|-----------------|----------------------------------------------------|
| 12 | VMAPRLLLL*  | HLA CLASS I HISTOCOMPATIBILITY ANTIGEN, A-1 ALPHA CHAIN OS=HOMO SAPIENS GN=A PE=1 SV=1 1A01_HUMAN            | 1028,57 | 35 | A*02:01 | Plasma Membrane | Immune response                                    |
| 13 | QTMGAPALKI* | Kinesin-like protein KIF13B OS=Homo sapiens GN=KIF13B PE=1 SV=1 KI13B_HUMAN                                  | 1044,61 | 23 | A*02:01 | Cytoplasm       | Cell growth and/or maintenance                     |
| 14 | VYNENLVHMI* | Pre-mRNA-splicing factor SPF27 OS=Homo sapiens GN=BCAS2 PE=1 SV=1 SPF27_HUMAN                                | 1246,55 | 44 | A*02:01 | Nucleus         | Cell communication ; Signal transduction           |
| 15 | FPMEIRQY*   | Signal transducer and activator of transcription 1-alpha/beta OS=Homo sapiens GN=STAT1 PE=1 SV=2 STAT1_HUMAN | 1098,51 | 41 | B*15:11 | Cytoplasm       | Transcription factor/Transcription factor activity |
| 16 | GPQRSVCE    | C-TYPE LECTIN DOMAIN FAMILY 4 MEMBER A OS=HOMO SAPIENS GN=CLEC4A PE=1 SV=1 CLC4A_HUMAN                       | 874,29  | 17 | B*15:11 | Plasma Membrane | Immune response                                    |
| 17 | NAAVVMAV*   | AP-3 complex subunit beta-1 OS=Homo sapiens GN=AP3B1 PE=1 SV=3 AP3B1_HUMAN                                   | 789,42  | 25 | B*15:11 | Plasma Membrane | Protein metabolism                                 |
| 18 | DPNLEFVAM*  | GTP-binding nuclear protein Ran OS=Homo sapiens GN=RAN PE=1 SV=3 RAN_HUMAN                                   | 1050,48 | 39 | B*15:11 | Nucleus         | Cell communication ; Signal transduction           |
| 19 | DQMISRIEY*  | Casein kinase I isoform alpha OS=Homo sapiens GN=CSNK1A1 PE=1 SV=2 KC1A_HUMAN                                | 1169,54 | 27 | B*15:11 | Cytoplasm       | Cell cycle                                         |
| 20 | FNDPNAKEM*  | Zinc finger RNA-binding protein OS=Homo sapiens GN=ZFR PE=1 SV=2 ZFR_HUMAN                                   | 1080,46 | 30 | B*15:11 | Nucleus         | Transcription factor/Transcription factor activity |
| 21 | LEGMPQDTY   | DNA-binding protein RFX7 OS=Homo sapiens GN=RFX7 PE=1 SV=1 RFX7_HUMAN                                        | 1052,6  | 26 | B*15:11 | unknown         | unknown                                            |
| 22 | LPASINTAY   | Matrix metalloproteinase-14 OS=Homo sapiens GN=MMP14 PE=1 SV=3 MMP14_HUMAN                                   | 948,49  | 37 | B*15:11 | Extracellular   | Protein metabolism                                 |
| 23 | LPREGEQNF   | Nck-associated protein 1-like OS=Homo sapiens GN=NCKAP1L PE=1 SV=3 NCKPL_HUMAN                               | 1088,54 | 17 | B*15:11 | Plasma Membrane | unknown                                            |
| 24 | MPAAGGVLY*  | Hepatocyte growth factor-regulated tyrosine kinase substrate OS=Homo sapiens GN=HGS PE=1 SV=1 HGS_HUMAN      | 893,45  | 44 | B*15:11 | Cytoplasm       | Cell communication ; Signal transduction           |
| 25 | MPLEDMNEF*  | Replication protein A 32 kDa subunit OS=Homo sapiens GN=RPA2 PE=1 SV=1 RFA2_HUMAN                            | 1156,45 | 26 | B*15:11 | Nucleus         | DNA binding                                        |
| 26 | MPNGTVQRF*  | Nucleosome-remodeling factor subunit BPTF OS=Homo sapiens GN=BPTF PE=1 SV=3 BPTF_HUMAN                       | 1064,52 | 43 | B*15:11 | Nucleus         | Transcription factor/Transcription factor activity |
| 27 | NAFKEITTM*  | Transcription initiation factor IIB OS=Homo sapiens GN=GTF2B PE=1 SV=1 TF2B_HUMAN                            | 1069,5  | 34 | B*15:11 | Nucleus         | Transcription factor/Transcription factor activity |

|    |            |                                                                                                                                    |         |    |         |                                      |                                             |
|----|------------|------------------------------------------------------------------------------------------------------------------------------------|---------|----|---------|--------------------------------------|---------------------------------------------|
| 28 | NPVGGALLEY | Double-stranded RNA-specific adenosine deaminase<br>OS=Homo sapiens GN=ADAR PE=1 SV=4<br>DSRAD_HUMAN                               | 960,48  | 37 | B*15:11 | Nucleus                              | Deaminase activity                          |
| 29 | SPTDSTPAL  | Regulator of cell cycle RGCC OS=Homo sapiens<br>GN=RGCC PE=1 SV=1 RGCC_HUMAN                                                       | 887,43  | 29 | B*15:11 | unknown                              | unknown                                     |
| 30 | SPVDSVLFY  | Catenin beta-1 OS=Homo sapiens GN=CTNNB1 PE=1<br>SV=1 CTNB1_HUMAN                                                                  | 1025,53 | 37 | B*15:11 | unknown                              | unknown                                     |
| 31 | TPPTDTILY  | Killer cell immunoglobulin-like receptor 3DL1<br>OS=Homo sapiens GN=KIR3DL1 PE=1 SV=1<br>KI3L1_HUMAN                               | 1019,54 | 21 | B*15:11 | Plasma<br>Membrane                   | Immune response                             |
| 32 | TPTGIKVVM* | Trafficking protein particle complex subunit 1<br>OS=Homo sapiens GN=TRAPP1 PE=1 SV=1<br>TPPC1_HUMAN                               | 960,52  | 33 | B*15:11 | Golgi apparatus                      | Transport                                   |
| 33 | AYVHMVTHF* | Bax inhibitor 1 OS=Homo sapiens GN=TMBIM6 PE=1<br>SV=2 BI1_HUMAN                                                                   | 1119,49 | 38 | B*15:11 | Membrane                             | Apoptosis                                   |
| 34 | FDPKIPITQY | Dolichyl-diphosphooligosaccharide--protein<br>glycosyltransferase 48 kDa subunit OS=Homo sapiens<br>GN=DDOST PE=1 SV=4 OST48_HUMAN | 1107,54 | 41 | B*15:11 | Endoplasmic<br>reticulum             | Metabolism ; Energy<br>pathways             |
| 35 | FPNIPGKSL  | Sphingolipid delta(4)-desaturase DES1 OS=Homo<br>sapiens GN=DEGS1 PE=1 SV=1 DEGS1_HUMAN                                            | 971,51  | 51 | B*15:11 | Endoplasmic<br>reticulum<br>Membrane | Metabolism ; Energy<br>pathways             |
| 36 | FYMDTSHLF* | Protein PRRC2C OS=Homo sapiens GN=PRRC2C PE=1<br>SV=4 PRC2C_HUMAN                                                                  | 1175,45 | 36 | B*15:11 | Membrane                             | unknown                                     |
| 37 | IYIINVHSM* | DENN domain-containing protein 3 OS=Homo<br>sapiens GN=DENND3 PE=2 SV=2 DEND3_HUMAN                                                | 1104,53 | 39 | B*15:11 | unknown                              | unknown                                     |
| 38 | KFIDTTSKF  | 60S ribosomal protein L3 OS=Homo sapiens<br>GN=RPL3 PE=1 SV=2 RL3_HUMAN                                                            | 1085,32 | 38 | B*15:11 | Cytoplasm                            | Protein metabolism                          |
| 39 | LPDEIYHVY  | N-terminal Xaa-Pro-Lys N-methyltransferase 1<br>OS=Homo sapiens GN=NTMT1 PE=1 SV=3<br>NTM1A_HUMAN                                  | 1147,51 | 32 | B*15:11 | Nucleus                              | Cell cycle                                  |
| 40 | LPDTLKVTY  | Integrin beta-2 OS=Homo sapiens GN=ITGB2 PE=1<br>SV=2 ITB2_HUMAN                                                                   | 1048,56 | 63 | B*15:11 | Plasma<br>Membrane                   | Cell communication ;<br>Signal transduction |
| 41 | LPIEAPIRM* | Cytochrome c oxidase subunit 2 OS=Homo sapiens<br>GN=MT-CO2 PE=1 SV=1 COX2_HUMAN                                                   | 1054,55 | 42 | B*15:11 | Mitochondrion                        | Metabolism ; Energy<br>pathways             |
| 42 | MMNVSKISF* | Sodium-coupled neutral amino acid transporter 2<br>OS=Homo sapiens GN=SLC38A2 PE=1 SV=2<br>S38A2_HUMAN                             | 1087,47 | 58 | B*15:11 | Plasma<br>Membrane                   | Transport                                   |
| 43 | NAFEVAEKY  | Alpha-actinin-4 OS=Homo sapiens GN=ACTN4 PE=1<br>SV=2 ACTN4_HUMAN                                                                  | 1069,49 | 41 | B*15:11 | Cytoplasm                            | Cell growth and/or<br>maintenance           |

|    |               |                                                                                                               |         |    |         |                 |                                                    |
|----|---------------|---------------------------------------------------------------------------------------------------------------|---------|----|---------|-----------------|----------------------------------------------------|
| 44 | NVIRDAVTY     | Histone H4 OS=Homo sapiens GN=HIST1H4A PE=1 SV=2 H4_HUMAN                                                     | 1049,3  | 33 | B*15:11 | Nucleus         | DNA binding                                        |
| 45 | SPVDSVLFY     | Catenin beta-1 OS=Homo sapiens GN=CTNNB1 PE=1 SV=1 CTNB1_HUMAN                                                | 1025,46 | 35 | B*15:11 | Plasma Membrane | Cell communication ; Signal transduction           |
| 46 | TYGEIFEKF     | NADH dehydrogenase [ubiquinone] 1 subunit C2 OS=Homo sapiens GN=NDUFC2 PE=1 SV=1 NDUC2_HUMAN                  | 1132,51 | 44 | B*15:11 | Mitochondrion   | Metabolism ; Energy pathways                       |
| 47 | VPLDERIVF     | Niban-like protein 1 OS=Homo sapiens GN=FAM129B PE=1 SV=3 NIBL1_HUMAN                                         | 1086,57 | 36 | B*15:11 | Nucleus         | unknown                                            |
| 48 | VYAQVARLF     | Paired amphipathic helix protein Sin3a OS=Homo sapiens GN=SIN3A PE=1 SV=2 SIN3A_HUMAN                         | 1065,57 | 41 | B*15:11 | Nucleus         | Transcription factor/Transcription factor activity |
| 49 | YPVIMTNEL*    | Olfactory receptor 5H6 OS=Homo sapiens GN=OR5H6 PE=2 SV=2 OR5H6_HUMAN                                         | 1094,49 | 31 | B*15:11 | Plasma Membrane | Cell communication ; Signal transduction           |
| 50 | FPMTHGNTGF*   | Poly(rC)-binding protein 2 OS=Homo sapiens GN=PCBP2 PE=1 SV=1 PCBP2_HUMAN                                     | 1123,47 | 30 | B*15:11 | Nucleus         | RNA binding                                        |
| 51 | GPPGQQGTPG    | Collagen alpha-2(XI) chain OS=Homo sapiens GN=COL11A2 PE=1 SV=5 COBA2_HUMAN                                   | 894,52  | 16 | B*15:11 | Extracellular   | Cell growth and/or maintenance                     |
| 52 | HPMNDPRTTF*   | Lysosomal protein NCU-G1 OS=Homo sapiens GN=C1orf85 PE=1 SV=1 NCUG1_HUMAN                                     | 1230,6  | 15 | B*15:11 | Membrane        | unknown                                            |
| 53 | LPSPVTAQKY    | Elongation factor 2 OS=Homo sapiens GN=EEF2 PE=1 SV=4 EF2_HUMAN                                               | 1102,58 | 48 | B*15:11 | Cytoplasm       | Protein metabolism                                 |
| 54 | MIMQQGMASST*  | Mastermind-like domain-containing protein 1 OS=Homo sapiens GN=MAMLD1 PE=1 SV=2 MAMD1_HUMAN                   | 1098,53 | 16 | B*15:11 | unknown         | unknown                                            |
| 55 | ATPVSPAMSY    | Inter-alpha-trypsin inhibitor heavy chain H3 OS=Homo sapiens GN=ITIH3 PE=1 SV=2 ITIH3_HUMAN                   | 1022,57 | 38 | B*15:11 | Extracellular   | Protein metabolism                                 |
| 56 | FYMDTSHLF*    | Protein PRRC2C OS=Homo sapiens GN=PRRC2C PE=1 SV=4 PRC2C_HUMAN                                                | 1176,5  | 36 | B*15:11 | RNA binding     | Membrane                                           |
| 57 | FPASFPNRQY    | Minor histocompatibility antigen H13 OS=Homo sapiens GN=HM13 PE=1 SV=1 HM13_HUMAN                             | 1225,55 | 41 | B*15:11 | Membrane        | Immune response                                    |
| 58 | MPVGPDAILRY*  | Large proline-rich protein BAG6 OS=Homo sapiens GN=BAG6 PE=1 SV=2 BAG6_HUMAN                                  | 1246,59 | 77 | B*15:11 | Cytoplasm       | Apoptosis                                          |
| 59 | NPILSMLTNQTG* | UDP-GlcNAc:betaGal beta-1,3-N-acetylglucosaminyltransferase 2 OS=Homo sapiens GN=B3GNT2 PE=1 SV=2 B3GN2_HUMAN | 1303,75 | 14 | B*15:11 | Membrane        | Metabolism ; Energy pathways                       |

|    |              |                                                                                                                |         |    |         |                    |                                                          |
|----|--------------|----------------------------------------------------------------------------------------------------------------|---------|----|---------|--------------------|----------------------------------------------------------|
| 60 | YPQQSPYPATGG | Vacuolar protein sorting-associated protein 37C<br>OS=Homo sapiens GN=VPS37C PE=1 SV=2<br>VP37C_HUMAN          | 1264,79 | 19 | B*15:11 | Endosome           | Transport                                                |
| 61 | SNEDAADD     | Sodium-dependent neutral amino acid transporter<br>B(0)AT2 OS=Homo sapiens GN=SLC6A15 PE=1 SV=1<br>S6A15_HUMAN | 835,36  | 19 | C*03:03 | Plasma<br>Membrane | Transport                                                |
| 62 | EPPPPPAYR    | Thyroid receptor-interacting protein 6 OS=Homo<br>sapiens GN=TRIP6 PE=1 SV=3 TRIP6_HUMAN                       | 1022,51 | 27 | B*15:11 | Nucleus            | Transcription<br>factor/Transcription<br>factor activity |
| 63 | LGVAEALHP    | Serine/threonine-protein kinase STK11 OS=Homo<br>sapiens GN=STK11 PE=1 SV=1 STK11_HUMAN                        | 905,45  | 44 | C*03:03 | Cytoplasm          | Cell communication ;<br>Signal transduction              |
| 64 | SAAMPGASL*   | Beta-1,4-galactosyltransferase 1 OS=Homo sapiens<br>GN=B4GALT1 PE=1 SV=5 B4GT1_HUMAN                           | 819,38  | 32 | C*03:03 | Golgi apparatus    | Metabolism ; Energy<br>pathways                          |
| 65 | VTVPPGPSL    | Putative PIP5K1A and PSMD4-like protein OS=Homo<br>sapiens GN=PIPSL PE=5 SV=1 PIPSL_HUMAN                      | 865,49  | 27 | C*03:03 | unknown            | unknown                                                  |
| 66 | YGYTRVAEM*   | Matrix metalloproteinase-9 OS=Homo sapiens<br>GN=MMP9 PE=1 SV=3 MMP9_HUMAN                                     | 1104,49 | 46 | C*03:03 | Extracellular      | Protein metabolism                                       |
| 67 | EDAELFMAL    | Dedicator of cytokinesis protein 5 OS=Homo sapiens<br>GN=DOCK5 PE=1 SV=3 DOCK5_HUMAN                           | 1053,49 | 40 | C*03:03 | unknown            | Cell communication ;<br>Signal transduction              |
| 68 | FAEGFVRAL    | Transcription factor AP-1 OS=Homo sapiens GN=JUN<br>PE=1 SV=2 JUN_HUMAN                                        | 1008,51 | 55 | C*03:03 | Nucleus            | Transcription<br>factor/Transcription<br>factor activity |
| 69 | FVIETARQL    | Interferon regulatory factor 2-binding protein-like<br>OS=Homo sapiens GN=IRF2BPL PE=1 SV=1<br>I2BPL_HUMAN     | 1075,57 | 39 | C*03:03 | Nucleus            | Transcription<br>factor/Transcription<br>factor activity |
| 70 | SAAFPGASL    | DAZ-associated protein 2 OS=Homo sapiens<br>GN=DAZAP2 PE=1 SV=1 DAZP2_HUMAN                                    | 819,4   | 39 | C*03:03 | unknown            | RNA binding                                              |
| 71 | MRHTNYSFSP*  | Macrophage colony-stimulating factor 1 receptor<br>OS=Homo sapiens GN=CSF1R PE=1 SV=2<br>CSF1R_HUMAN           | 1254,5  | 27 | C*03:03 | Plasma<br>Membrane | Immune response                                          |
| 72 | YVHDAPVRSL   | Interleukin-1 beta OS=Homo sapiens GN=IL1B PE=1<br>SV=2 IL1B_HUMAN                                             | 1155,56 | 42 | C*03:03 | Extracellular      | Immune response                                          |
| 73 | TALQQARELQA  | TETRATRICOPEPTIDE REPEAT PROTEIN 21B<br>OS=HOMO SAPIENS GN=TTC21B PE=1 SV=2<br>TT21B_HUMAN                     | 1227,67 | 11 | C*03:03 | unknown            | unknown                                                  |
| 74 | YASGRTTGIVM* | Beta-actin-like protein 2 OS=Homo sapiens<br>GN=ACTBL2 PE=1 SV=2 ACTBL_HUMAN                                   | 1170,58 | 32 | C*03:03 | unknown            | unknown                                                  |

|    |               |                                                                                                  |         |    |         |                       |                                           |
|----|---------------|--------------------------------------------------------------------------------------------------|---------|----|---------|-----------------------|-------------------------------------------|
| 75 | GAVLSPSEKSYQ  | Interleukin-1 receptor-associated kinase 3 OS=Homo sapiens GN=IRAK3 PE=1 SV=2 IRAK3_HUMAN        | 1264,78 | 19 | C*03:03 | unknown               | Cell communication ; Signal transduction  |
| 76 | NGADGPQGGPPGG | Collagen alpha-2(XI) chain OS=Homo sapiens GN=COL11A2 PE=1 SV=5 COBA2_HUMAN                      | 1022,57 | 17 | C*03:03 | Extracellular         | Cell growth and/or maintenance            |
| 77 | PGAAPALAPSG   | Nuclear envelope pore Membrane protein POM 121 OS=Homo sapiens GN=POM121 PE=1 SV=2 P121A_HUMAN   | 1182,45 | 30 | C*03:03 | Nucleus               | Transport                                 |
| 78 | IILIL         | TETRASPANIN-15 OS=HOMO SAPIENS GN=TSPAN15 PE=2 SV=1 TSN15_HUMAN                                  | 583,44  | 23 | #       | Membrane              | Cell communication ; Signal transduction  |
| 79 | AHLLLL        | PROTODHERIN GAMMA-A11 OS=HOMO SAPIENS GN=PCDHGA11 PE=1 SV=1 PCDGB_HUMAN                          | 678,5   | 42 | #       | Plasma Membrane       | Cell growth and/or maintenance            |
| 80 | TPRAGE        | CTD SMALL PHOSPHATASE-LIKE PROTEIN 2 OS=HOMO SAPIENS GN=CTDSPL2 PE=1 SV=2 CTSL2_HUMAN            | 629,41  | 24 | #       | Nucleus               | unknown                                   |
| 81 | VPKAVM*       | Dynamin-1-like protein OS=Homo sapiens GN=DNM1L PE=1 SV=2 DNM1L_HUMAN                            | 659,35  | 20 | #       | Cytoplasm             | Mitochondrion organization and biogenesis |
| 82 | DAGVPGH       | Laminin subunit alpha-2 OS=Homo sapiens GN=LAMA2 PE=1 SV=4 LAMA2_HUMAN                           | 651,39  | 31 | #       | Extracellular         | Cell growth and/or maintenance            |
| 83 | GIPMVL*       | Rho-related GTP-binding protein RhoF OS=Homo sapiens GN=RHOPE=2 SV=1 RHOPE_HUMAN                 | 757,4   | 28 | #       | Plasma Membrane       | Cell communication ; Signal transduction  |
| 84 | PGGAGAS       | Neuropeptide B OS=Homo sapiens GN=NPB PE=1 SV=1 NPB_HUMAN                                        | 515,3   | 10 | #       | unknown               | Cell communication ; Signal transduction  |
| 85 | QSGPEEI       | Adenylate cyclase type 8 OS=Homo sapiens GN=ADCY8 PE=1 SV=1 ADCY8_HUMAN                          | 758,4   | 30 | #       | Plasma Membrane       | Cell communication ; Signal transduction  |
| 86 | ARSQVVF       | Procollagen-lysine,2-oxoglutarate 5-dioxygenase 1 OS=Homo sapiens GN=PLOD1 PE=1 SV=2 PLOD1_HUMAN | 805,4   | 39 | #       | Endoplasmic reticulum | Metabolism ; Energy pathways              |
| 87 | TYMLSITG*     | Olfactory receptor 6C74 OS=Homo sapiens GN=OR6C74 PE=2 SV=1 O6C74_HUMAN                          | 900,32  | 21 | #       | Membrane              | Cell communication ; Signal transduction  |

\*amino acid methionine oxidized

# HLA assignment undefined
